RESEARCH ARTICLE

# Identification and Comparative Expression Profiles of Chemoreception Genes Revealed from Major Chemoreception Organs of the Rice Leaf Folder, *Cnaphalocrocis medinalis* (Lepidoptera: Pyralidae)

Fang-Fang Zeng<sup>1</sup>, Zhen-Fei Zhao<sup>1</sup>, Miao-Jun Yan<sup>1</sup>, Wen Zhou<sup>1</sup>, Zan Zhang<sup>1</sup>, Aijun Zhang<sup>2</sup>, Zhong-Xian Lu<sup>3</sup>, Man-Qun Wang<sup>1\*</sup>

**1** Hubei Insect Resources Utilization and Sustainable Pest Management Key Laboratory, College of Plant Science and Technology, Huazhong Agricultural University, Wuhan, 430070, P. R. China, **2** Invasive Insect Biocontrol and Behavior Laboratory, BARC-West, USDA-ARS, Beltsville, Maryland, 20705–2350, United States of America, **3** Institute of Plant Protection and Microbiology, Zhejiang Academy of Agricultural Sciences, Hangzhou, 310021, P. R. China

\* [mqwang@mail.hzau.edu.cn](mailto:mqwang@mail.hzau.edu.cn)

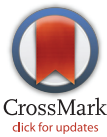

OPEN ACCESS

**Citation:** Zeng F-F, Zhao Z-F, Yan M-J, Zhou W, Zhang Z, Zhang A, et al. (2015) Identification and Comparative Expression Profiles of Chemoreception Genes Revealed from Major Chemoreception Organs of the Rice Leaf Folder, *Cnaphalocrocis medinalis* (Lepidoptera: Pyralidae). PLoS ONE 10(12): e0144267. doi:10.1371/journal.pone.0144267

**Editor:** J Joe Hull, USDA-ARS, UNITED STATES

**Received:** May 30, 2015

**Accepted:** November 16, 2015

**Published:** December 11, 2015

**Copyright:** This is an open access article, free of all copyright, and may be freely reproduced, distributed, transmitted, modified, built upon, or otherwise used by anyone for any lawful purpose. The work is made available under the [Creative Commons CC0](https://creativecommons.org/licenses/by/4.0/) public domain dedication.

**Data Availability Statement:** The clean reads of the *C. medinalis* transcriptome were stored in the NCBI SRA database, under the accession number of SRS839585, SRS839595, SRS839603, SRS839604, SRS839605 and SRS839606.

**Funding:** This study was supported and funded by the National High Technology Research and Development Program of China (863 Program) (No. 2014AA10A605), the China Agriculture Research System (Grant No. CARS-01-17) and the Fundamental Research Funds for the Central Universities (2013PY046). The funders had no role in

## Abstract

To better understand the olfactory mechanisms in the rice leaf folder, *Cnaphalocrocis medinalis* (Guenée), a serious pest of rice in Asia, we established six partial transcriptomes from antennae, protarsus, and reproductive organs of male and female adults. A total of 102 transcripts were identified, including 29 odorant receptors (ORs), 15 ionotropic receptors (IRs), 30 odorant-binding proteins (OBPs), 26 chemosensory proteins (CSPs), and 2 sensory neuron membrane proteins (SNMPs). The expression patterns of these genes were calculated by fragments per kilobase of exon per million fragments mapped (FPKM) and validated by real-time quantitative PCR (RT-qPCR). Some transcripts were exclusively expressed in specific organs, such as female protarsus, whereas others were universally expressed, this varied expression profile may provide insights into the specific functions mediated by chemoreception proteins in insects. To the best of our knowledge, among the 102 identified transcripts, 81 are novel and have never been reported before. In addition, it also is the first time that ORs and IRs are identified in *C. medinalis*. Our findings significantly enhance the currently limited understanding olfactory mechanisms of the olfactory mechanisms underlying the chemoreception system in *C. medinalis*.

## Introduction

The leaf folder, *Cnaphalocrocis medinalis* (Guenée) is a migratory rice pest in humid tropical and temperate regions of Oceania, Africa, and Asia [1]. The larvae can damage plants by folding the leaves and scraping the green leaf tissues within the fold, this activity reduces

study design, data collection and analysis, decision to publish, or preparation of the manuscript.

**Competing Interests:** The authors have declared that no competing interests exist.

photosynthetic activity and causes yield losses [2]. Because of the cryptic feeding habits of larvae, chemical treatments are often impracticable. Chemical sensing mediates key behaviors in herbivorous insects, including seeking host plants, finding mating partners, selecting oviposition sites, and facilitating the detection of predators and toxic compounds [3]. Given this critical role in insect survival, regulating chemoreception as a means to control target insect pests is a potential safe and effective pest management measure.

Compared with vertebrates, insects have independent receptors localized in specific tissues, such as antennae, mouthparts, legs, wings, and ovipositor [4]. It is speculated that olfactory sensors mainly exist in antennae, whereas gustatory sensors can be found in legs [5], especially on the ventral surfaces of the tarsi (feet), where they come into contact with whatever they are walking on. Additionally, in some species, similar receptors are scattered over the surface of the body and may also be present on the egg-laying apparatus [4].

Chemosensation is orchestrated at various levels, starting with reception of semiochemicals at the periphery, processing of those signals at the antennal lobes, integration of olfactory and other sensory modalities in the higher processing centers of the brain, and ultimately translation of chemical signals into internal physiology and other external cues and signals [6]. During the peripheral process, diverse genes are utilized, including odorant binding proteins (OBPs), chemosensory proteins (CSPs), and chemosensory receptors [7, 8]. It is thought that external chemicals enter the chemosensilla at which point odorants or non-volatile chemicals are captured by odorant-binding proteins (OBPs) and/or chemosensory proteins (CSPs) [9], and then transported through the aqueous sensillar lymph to the olfactory receptors. There the chemical messages are converted into electrical signals carrying information about the external world to the brain [10]. In addition, other chemosensory proteins have also been proposed to play a role in insect olfaction. Two critical classes are sensory neuron membrane proteins (SNMPs) [11, 12] and ionotropic receptors (IRs). OBPs and CSPs are both small water-soluble extracellular proteins containing a hydrophobic pocket [9, 13]. In Lepidoptera, most insect OBPs share six conserved cysteines (C1-X<sub>25-30</sub>-C2-X<sub>3</sub>-C3-X<sub>36-42</sub>-C4-X<sub>8-14</sub>-C5-X<sub>8</sub>-C6), whereas CSPs shares four (C1-X<sub>6</sub>-C2-X<sub>18</sub>-C3-X<sub>2</sub>-C4) [14]. It is now well accepted that OBPs and CSPs solubilize ligands, help transport hydrophobic molecules (towards odorants and pheromones) through the aqueous environment of the sensillar lymph, and contribute to the sensitivity of the insect olfactory system [15, 16]. However, besides this, OBPs and CSPs can also participate in physiological processes that extend beyond chemoreception [17, 18].

Chemosensory receptors (both olfactory and gustatory receptors) are trans-membrane proteins located in the dendrite membrane of receptor neurons. They play central roles as biotransducers [7, 19]. The classical odorant receptors (ORs), similar to gustatory receptors (GRs), are extremely divergent seven-transmembrane domain (7TM) proteins, sharing as little as 8% amino acid identity within the same species [19]. In *Drosophila*, a novel OR sub-family, the odorant receptor co-receptor (Orco) was discovered, which is a single, atypical receptor that is co-expressed with conventional ORs in nearly all olfactory neurons [20]. Orco is highly conserved, sharing up to 94% sequence identity with orthologues amongst insect species [21]. It has been postulated that an olfactory receptor neuron (ORN) expresses one to three ligand-binding ORs with the conserved ubiquitous Orco [22]. The OR/Orco makes up a stand-alone heteromeric structure that functions as a ligand-gated ion channel to trigger the signal transduction cascade [21]. In Lepidopterans, numerous ORs specialized in the detection of sex pheromones, so-called pheromone receptors (PRs), have also been functionally characterized [23–27].

Recently, a new family of chemosensory receptors—the ionotropic receptor (IR) family was identified in *Drosophila melanogaster* by bioinformatic analyses [28]. IRs comprise a recently discovered ionotropic glutamate receptor (iGluR)—like protein family, involved in chemo-

sensation [28]. Insect IRs contain structural regions that are conserved in iGluRs, including three trans-membrane domains, a two-way ligand-binding domain with two lobes, and one ion channel pore. However, the conserved iGluR glutamate-binding residues in the two lobes are not retained in IRs, indicating their atypical binding characters [28]. Unlike ORs, two or three IR genes appear to be always co-expressed with one or both of the conserved IR8a and IR25a genes in an IR-expressing neuron [29]. In *Drosophila*, IR64a and IR8a formed a functional ion channel that allowed ligand-evoked cation currents indicating that IR8a is a subunit that forms a functional olfactory receptor with IR64a in vivo to mediate odor detection [30]. Furthermore, IRs can be classified into two distinct subfamilies. One is the conserved ‘antennal IRs’, which have been proposed to be derived from an animal iGluR ancestor and thus represent the first olfactory receptor family in insects. The other is the species-specific ‘divergent IRs’, which have been implicated in taste and are derived from ‘antennal IR’ ancestors [31]. Additionally, sensory neuron membrane proteins (SNMPs) of which there are two sub-types of SNMP proteins, SNMP1 and SNMP2 in different insects [32], might also participate in chemoreception.

Identification of chemosensory genes is a prerequisite for functional characterization of olfactory genes. With the development of next generation sequencing (NGS) techniques, numerous chemoreception genes have been identified from various insect species, such as *Manduca sexta* [33], *Cydia pomonella* [26], *Aphis gossypii* [34], *Helicoverpa armigera* [35], *Sesamia inferens* [36], *Chilo suppressalis* [37], and *Spodoptera littoralis* [18, 38]. Although numerous chemosensory genes have been molecularly identified based on sequence similarity to reported genes in almost all insect orders, their exact functions are largely unknown. The expression profiles, particularly the tissue distribution, could provide important information on the functions of the chemosensory genes [39–41].

Previously, we reported sequencing and analyses of a *C. medinalis* antennal cDNA library and identified a subset of chemosensory genes corresponding to 5 OBPs and 3 CSPs [42]. Herein, to extend our view of the *C. medinalis* transcriptome and significantly increase the number of annotated olfactory genes, samples of the major olfactory organs, including antennae, protarsus, and reproductive organs from both male and female were analyzed. Our new analysis resulted in a total of 67,357 unigenes gene ontology (GO) annotations of which revealed enrichment in binding and catalytic activities. These data allowed us to identify novel *C. medinalis* olfactory genes, including binding proteins and chemosensory receptors. Furthermore, fragments per kilobase of exon per million fragments mapped (FPKM) calculations were performed to represent the expression levels, and real-time quantitative PCR (RT-qPCR) experiments were conducted on eight selected genes to validate our results.

## Materials and Methods

### Insect resources

*C. medinalis* larvae or pupae were collected from rice field in Wuxue, a county of Hubei Province in China (115°45'E; 30°00'N). The properties were not privately owned or protected in any way, and this field study did not involve endangered or protected species. The larvae were reared in buckets in the laboratory until pupation. Pupae were sexed and maintained separately inside glass tubes until moths emerged. Immediately after emergence, female and male adults were provided a 10% sucrose solution. To obtain mated females, newly emerged male and female moths were paired in plastic-screen cages (20 × 20 × 10 cm). Antennal (At), Protarsus (P), and reproductive organs (Ro) were isolated from mixed population adults 1–5 days after eclosion and kept separately in a freezer (-80°C) until use.

## RNA preparation and cDNA library construction and sequencing

Frozen samples were individually crushed in a liquid nitrogen-cooled vitreous homogenizer and total RNA from each sample (~200 adult male or female moths) was extracted using TRIzol reagent (Invitrogen, Carlsbad, CA, USA) following the manufacturer's instructions. Residual genomic DNA was removed using DNase I (Promega, Madison, WI, USA). Total RNA was dissolved in RNase-free water and RNA integrity was verified by gel electrophoresis. The RNA quantity was determined on a Nanodrop ND-2000 spectrophotometer (NanoDrop products, Wilmington, DE, USA).

Poly-A RNA was isolated from about 10–20 µg of the total RNA of different tissue samples was extracted using oligo (dT) magnetic beads. Then, poly-A RNA for each sample was digested into short fragments in a fragmentation buffer. Random hexamers were used for first-strand cDNA, followed by second-strand cDNA synthesis using RNase H and DNA polymerase I. These dual-strand DNA samples were treated with T4 DNA Polymerase and T4 Polynucleotide Kinase for end-repair and dA-tailing, followed by adaptor ligation to the dsDNA dA tail using T4 DNA ligase. Products corresponding to insert length ~200 bp were collected by 2% agarose gel electrophoresis and purified with a Takara quick Gel Extraction Kit (Takara, Hilden, Germany) and used as templates for PCR amplification to create a cDNA library. The library was pair-end sequenced using a PE90 strategy (paired-end reads of 90 base pairs per read) on an Illumina HiSeq™ 2000 (Illumina, San Diego, CA, USA) at the Beijing Genome Institute (Wuhan, China). Different libraries were sequenced in one lane; raw-reads were sorted by barcodes in the sequencing adaptor.

## Assembly and functional annotation

The clean-read dataset was generated from raw-reads by the following steps. First, reads with adaptors or those containing more than 5% unknown nucleotides (Ns) were directly removed. Second, low quality reads containing more than 20% suspect-nucleotides with a Phred Quality Score less than 10 were filtered out. Finally, both ends of the reads were evaluated to trim unreliable ends containing more than 3 successive suspect-nucleotides. Each clean-read dataset of all of the male and female tissues were separately de novo assembly using a paired-reads mode and default parameters in Trinity r2012-06-08 [43]. The Trinity outputs were clustered using TGICL [44]. Consensus cluster sequences and singletons made up the unigene dataset.

Those unigenes larger than 150 bp were first aligned using BLASTx to protein databases, including Nr, Nt, Swiss-Prot, KEGG, COG, and GO (e-value < 1e-5). Proteins with the highest sequence similarity with the given unigenes along with their protein functional annotations were subsequently retrieved. BLAST results were then imported into Blast2GO pipeline [45] for GO Annotation. Protein coding region prediction was performed using OrfPredictor according to the BLAST results. Blast2GO was used to retrieve GO annotations of the unigenes with GO functional classification obtained using WEGO software. Then the best hit sequences were searched by BlastX in NCBI.

## Expression abundance analysis of unigenes

The expression abundance of the unigenes was calculated by the FPKM method [46] using the formula with software program:  $FPKM(A) = 106 \times C / (N \times L / 103)$ . In this formula, FPKM (A) is the expression abundance of unigene A; C is the number of fragments that uniquely aligned to gene A by SOAP [47]; N is the total number of fragments that uniquely aligned to all genes; and L is the total number of bases in gene A. The FPKM method can eliminate the influence of different gene lengths and sequencing discrepancy on the calculation of expression abundance. These results can be directly used to compare expression differences in samples.

## Phylogenetic analyses

The open reading frames (ORFs) of the putative chemosensory genes were predicted using ORF finder (<http://www.ncbi.nlm.nih.gov/gorf/gorf.html>). Putative N-terminal signal peptides of OBPs and CSPs were predicted using SignalP 4.1 Server (<http://www.cbs.dtu.dk/services/SignalP/>). The TMDs (Trans-Membrane Domains) of ORs and IRs were predicted using TMHMM Server Version 2.0 (<http://www.cbs.dtu.dk/services/TMHMM>). Amino acid sequence alignments were generated using WebLogo (<http://weblogo.berkeley.edu/logo.cgi>). Sequences were initially aligned using ClustalW and phylogenetic trees were constructed using the neighbor-joining method [48], with the Jones—Taylor—Thornton (JTT) amino acid substitution model as implemented in MEGA5.2 software (<http://www.megasoftware.net/>). Node support was assessed using a bootstrap procedure of 1000 replicates and uniform rates with pairwise deletion of data gaps.

## Quantitative real-time PCR validation

Total RNA was extracted from tissue samples according to the methods above. First-strand cDNA was synthesized according to the protocol provided with the One Step SYBR<sup>®</sup> Prime-Script<sup>®</sup> RT-PCR kit (Takara Code: DRR066A). The eight tested genes were selected and PCR primers were designed with the NCBI primer design tool Primer-BLAST (S1 Table). Tissue expression profiling of adults was carried out by a Bio-Rad IQ5 real-time qPCR system. Product sizes of ~100–160 bp were used to measure increased fluorescence of SYBR green. Real-time qPCR was conducted in 20  $\mu$ l reactions that contained 10  $\mu$ l 2 $\times$  SYBR Green PCR Master Mix, 0.8  $\mu$ l of each primer (10 mM), 2  $\mu$ l sample cDNA, and 6.4  $\mu$ l sterilized ultrapure H<sub>2</sub>O (Millipore). To properly assess the efficiency of PCR amplification, all the primers were tested by at least five orders of magnitude in multiples (5logs) consecutive dilutions of template concentration with at least 3 times parallel repeated. Then the efficiency can be controlled >90%. To assess reproducibility, test samples and endogenous controls were carried out in triplicate. Cycling parameters were as follows: 94°C for 2 min, 40 cycles at 95°C for 10 s, and 60°C for 30 s. Products were analyzed by agarose gel electrophoresis, sequencing, and melt curve analysis, which indicated that the respective reactions did not yield non-specific amplification products. *CmedActin* was used as an endogenous control to normalize the expression of target genes in olfactory tissues [42]. Female antennae of 0d old adults were used as a calibrator to calculate  $\Delta\Delta$ Ct values between tissues ( $\Delta$ Ct male antennae or female legs or other tissues at any time point–  $\Delta$ Ct female antennae of 0 d). Moreover, relative quantification was performed using the comparative  $2^{-\Delta\Delta$ Ct} method [49] to identify differences in mRNA expression levels in different tissues and sexes of adults data indicate means  $\pm$  SE (n = 3). One-way ANOVO statistical analysis was used to measure the different expression levels in tissues.

## Results and Discussion

### Assembly

Transcriptomic sequence data were generated using Illumina HiSeq<sup>™</sup>2000/MiSeq technology. Approximately, 83.6, 90.2, 85.2, 84.5, 86.2, and 85.7 million raw-reads were obtained from libraries constructed from female and male antenna, tarsus, and reproductive organs, respectively. Additionally, 77.0, 83.3, 77.1, 76.7, 79.1, and 78.4 million respective clean-reads were obtained after filtering, followed by merging and clustering. A final transcript dataset with consisting of 67,357 unigenes was obtained. The dataset was 50.63 megabases with a mean length of 857 nt and an N50 of 1405 nt. There were 18,943 unigenes longer than 1000 nt, which accounted for 28.12% of the transcriptome assembly (Table 1).

Table 1. Data summary.

|         | Sample                   | Counts(total nb) | Total length | Mean length | N50  | Consensus Sequences | Distinct Clusters | Distinct Singletons |
|---------|--------------------------|------------------|--------------|-------------|------|---------------------|-------------------|---------------------|
| Contig  | Female Antennae          | 135,749          | 38,145,858   | 281         | 389  | —                   | —                 | —                   |
|         | Female ovipositorFe      | 140,371          | 36,913,097   | 263         | 354  | —                   | —                 | —                   |
|         | Male tarsus              | 121,628          | 32,420,687   | 267         | 357  | —                   | —                 | —                   |
|         | Male antennae            | 120,037          | 42,510,286   | 354         | 627  | —                   | —                 | —                   |
|         | Male reproductive organs | 126,108          | 34,488,011   | 273         | 364  | —                   | —                 | —                   |
|         | Male tarsus              | 127,457          | 32,729,371   | 257         | 329  | —                   | —                 | —                   |
| Unigene | Female Antennae          | 73,996           | 35,682,190   | 482         | 656  | 73,996              | 11,590            | 62,406              |
|         | Female ovipositor        | 69,100           | 33,135,277   | 480         | 696  | 69,100              | 12,464            | 56,636              |
|         | Female tarsus            | 62,338           | 28,960,889   | 465         | 654  | 62,338              | 9,778             | 52,560              |
|         | Male antennae            | 71,058           | 43,759,881   | 616         | 987  | 71,058              | 12,412            | 57,646              |
|         | Male reproductive organs | 68,047           | 31,559,480   | 464         | 618  | 68,047              | 10,184            | 57,863              |
|         | Male tarsus              | 66,827           | 29,066,891   | 435         | 548  | 66,827              | 9,189             | 57,638              |
|         | Merge                    | 67,357           | 57,697,863   | 857         | 1405 | 67,357              | 21,666            | 45,691              |

doi:10.1371/journal.pone.0144267.t001

### Homology analysis and gene ontology annotation

Among the 67,357 unigenes, 36,966 (54.8%) were matched using a BLASTX homology search to entries in the NCBI non-redundant (nr) protein database with a cut-off E-value of 10<sup>-5</sup>. The highest percentage of matched sequences (refers to only the best match for each unigene to a sequence in the blast database) was to *Danaus plexippus* (54.0%), followed by *Bombyx mori* (6.6%), *Tribolium castaneum* (4.2%), *Papilio xuthus* (2.9%), *Silurana tropicalis* (1.9%), *Papilio polytes* (1.1%), and *Acyrtosiphon pisum* (1.1%). The remaining 28.3% sequences were matched to other insect species (Fig 1A).

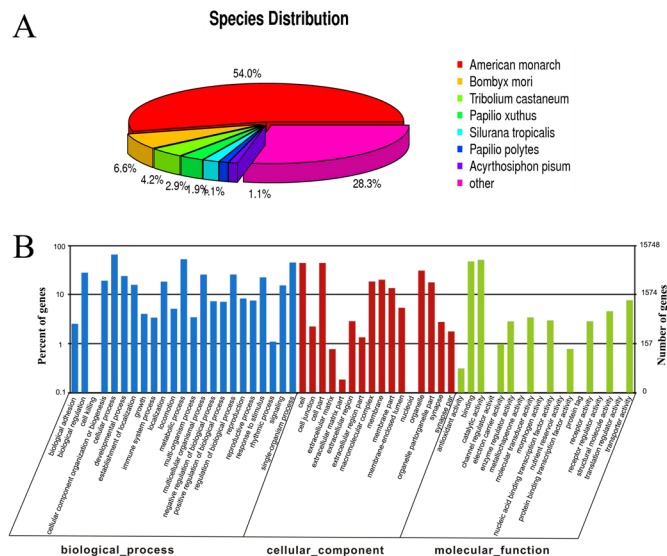

Fig 1. Annotation summary of *C. medinalis* antenna unigenes. (A) Species distribution of unigenes' best-hit annotation term in the nr database (B) Gene ontology classifications of the *C. medinalis* unigenes.

doi:10.1371/journal.pone.0144267.g001

Gene Ontology (GO) annotations were used to classify the 67,357 unigenes into different functional groups by BLAST2GO. Based on sequence homology, 15,748 unigenes (23.37%) could be annotated with each unigene classified into one or more functional groups of the three biological processes (Fig 1B). In the molecular function category, genes expressed in the antennae were mostly enriched in molecular binding activity (e.g., nucleotide, ion, and odorant binding) and catalytic activity (e.g., hydrolase and oxidoreductase). Among the biological process terms, cellular and metabolic processes were the most frequently represented, and in the cellular component terms, cell, cell part, and organelle were the most abundant (Fig 1B). These results are comparable to the reported *Chilo suppressalis* transcriptional profile [37].

## Identification of chemosensory receptor candidates

The unigenes related to chemosensory receptor candidates were identified by keyword searches of BLASTx annotations. To identify additional OR candidates, the predicted protein sequences of the unigenes were further searched by PSI-blastp with known lepidopteran chemosensory receptors (Tables 2 and 3). We identified 29 distinct unigenes that were candidates for OR genes and no GR gene like sequences longer than 200bp were identified in any tissue even tarsus. Among the OR genes, four sequences were full length ORs because they had an intact open reading frame with a general length of 1200 bp and 4 to 7 predicted transmembrane domains, which are characteristic of typical insect ORs. Based on typical OR lengths (around 400 amino acids), over 60% of the sequences identified represented fragments with missing 5' ends and only seven contained a deduced protein longer than 200 amino acids. Similar results have been reported in the transcriptomes of other species, such as *S. inferens* [36], *C. suppressalis*, and *H. armigera*.

In the phylogenetic analyses, lepidopteran putative pheromone receptors clustered in a subgroup (Fig 2). These four OR candidates were named "CmedPRx" (x = 1 through 4) to more clearly indicate putative function; this nomenclature was adopted to more clearly differentiate lepidopteran pheromone receptors from general odorant receptors, which generally have been poorly classified. The *C. medinalis* Orco orthologue, termed-CmedOrco, had a high degree of identity with other insect co-receptors. Almost all CmedOR candidates clustered with at least one putative lepidopteran orthologous in the phylogenetic tree.

Compared to genome-based identification the number of ORs identified in transcriptome analyses is typically limited. The number of ORs identified in the genomes of *D. melanogaster*, *A. gambiae*, and *B. mori* are 62, 79 and 72, respectively, while in antennal transcriptomes 47 were identified in *M. sexta* [33], 43 in *C. Pomonella* [26] and 47 in *H. armigera* [35]. In the European corn borer (*Ostrinia nubilalis*), a neuroanatomical study suggested 64 glomeruli in the antennal lobe of both genders [19], and in *H. virescens*, the total number of glomeruli, including dimorphic and isomorphic units, consisted of 64 in males and 62 in female [50]. It is believed that that one olfactory receptor type is expressed in the OSN and axonal projects of different OSNs express the same olfactory receptor, which converges on the same antennal lobe glomeruli. Indeed, some glomeruli can also be activated by OSNs that express other classes of chemoreceptors, such as ionotropic receptors [29]. Although there has been no reports on the number of glomeruli in *C. medinalis*, our dataset of 29 OR sequences is somewhat smaller than those of other insects [36, 37] even though the sequencing depth of our transcriptome was greater than others. There are several possible explanations to address this potential discrepancy. First, according to the sequence reads, the expression level of ORs in the *C. medinalis* antenna is very low, suggesting low transcript numbers (S1 Fig), resulting in lower detection metrics, which suggests that there is a high chance to identify additional low expression C.

**Table 2. Unigenes of candidates for olfactory receptors.**

| Gene name | Accession number | Unigene reference | ORF (aa) | Status         | TMD | Evalue | Blastx best hit                                                                  |
|-----------|------------------|-------------------|----------|----------------|-----|--------|----------------------------------------------------------------------------------|
| CmedPR1   | KP975162         | CI195             | 375      | complete       | 4   | 2e-76  | gb AGK43827.1  odorant receptor 5 [ <i>Plutella xylostella</i> ]                 |
| CmedPR2   | KP975163         | CI1885            | 434      | complete       | 6   | 6e-95  | gb ADB89183.1  odorant receptor 6 [ <i>Ostrinia nubilalis</i> ]                  |
| CmedPR3   | KP97514          | Unigene2572       | 290      | 5', 3' missing | 2   | 3e-76  | gb AGG91650.1  odorant receptor [ <i>Ostrinia furnacalis</i> ]                   |
| CmedPR4   | KP975165         | unigene7146       | 159      | 5' missing     | 2   | 3e-18  | dbj BAI66624.1  odorant receptor [ <i>Ostrinia nubilalis</i> ]                   |
| CmedOrco  | KP975160         | Unigene8047       | 473      | complete       | 7   | 0.0    | gb AGS41440.1 Odorant receptor co-receptor [ <i>Agrotis segetum</i> ]            |
| CmedOR1   | KP975136         | Unigene5798       | 448      | complete       | 6   | 0.0    | gb AIT72007.1  olfactory receptor 47, partial [ <i>Ctenopseustis obliquana</i> ] |
| CmedOR2   | KP975137         | Unigene8211       | 407      | complete       | 7   | 3e-101 | NP_001091792.1Candidate olfactory receptor[ <i>Bombyx mori</i> ]                 |
| CmedOR3   | KP975138         | CI4164            | 230      | 3' missing     | 4   | 1e-81  | gb AIG51891.1  odorant receptor, partial [ <i>Helicoverpa armigera</i> ]         |
| CmedOR4   | KP975139         | Unigene33571      | 216      | 5', 3' missing | 3   | 9e-75  | gb AFL70813.1  odorant receptor 50, partial [ <i>Manduca sexta</i> ]             |
| CmedOR5   | KP975140         | unigene2989       | 214      | 5' missing     | 4   | 1e-62  | NP_001157210.1  olfactory receptor 17 [ <i>Bombyx mori</i> ]                     |
| CmedOR6   | KP975141         | unigene14729      | 211      | 3' missing     | 3   | 1e-24  | gb AII01081.1  odorant receptors [ <i>Dendrolimus kikuchii</i> ]                 |
| CmedOR7   | KP975142         | cl1990            | 207      | 5' missing     | 4   | 5e-88  | gb AIG51891.1  odorant receptor, partial [ <i>Helicoverpa armigera</i> ]         |
| CmedOR8   | KP975143         | cl7710            | 201      | 5' missing     | 3   | 4e-70  | gb AII01102.1  odorant receptors [ <i>Dendrolimus kikuchii</i> ]                 |
| CmedOR9   | KP975144         | cl282             | 192      | 5' missing     | 1   | 7e-52  | gb AFL70813.1  odorant receptor 50, partial [ <i>Manduca sexta</i> ]             |
| CmedOR10  | KP975145         | unigene11382      | 179      | 5' missing     | 2   | 6e-97  | [gb AIG51892.1  odorant receptor [ <i>Helicoverpa armigera</i> ]                 |
| CmedOR11  | KP975146         | unigene7039       | 172      | 5' missing     | 2   | 2e-67  | gb AIG51899.1  odorant receptor [ <i>Helicoverpa armigera</i> ]                  |
| CmedOR12  | KP975147         | unigene20786      | 169      | 5' missing     | 2   | 2e-75  | gb AIG51873.1  odorant receptor [ <i>Helicoverpa armigera</i> ]                  |
| CmedOR13  | KP975148         | unigene30983      | 167      | 5' missing     | 2   | 2e-75  | gb ACM18061.1  putative odorant receptor OR3 [ <i>Manduca sexta</i> ]            |
| CmedOR14  | KP975149         | unigene35520      | 164      | 5', 3' missing | 1   | 2e-76  | gb AII01061.1  odorant receptors [ <i>Dendrolimus houi</i> ]                     |
| CmedOR15  | KP975150         | unigene14982      | 163      | 5', 3' missing | 2   | 2e-11  | gb AIT72018.1  olfactory receptor 67 [ <i>Ctenopseustis obliquana</i> ]          |
| CmedOR16  | KP975151         | unigene17854      | 163      | 5' missing     | 2   | 2e-66  | gb AIG51883.1  odorant receptor, partial [ <i>Helicoverpa armigera</i> ]         |
| CmedOR17  | KP975152         | unigene14624      | 162      | 5', 3' missing | 3   | 3e-46  | gb AIT71986.1  olfactory receptor 12 [ <i>Ctenopseustis obliquana</i> ]          |
| CmedOR18  | KP975153         | unigene3174       | 150      | 5', 3' missing | 3   | 1e-44  | gb AIT69895.1  olfactory receptor 46, partial [ <i>Ctenopseustis herana</i> ]    |
| CmedOR19  | KP975154         | unigene18118      | 139      | 5', 3' missing | 2   | 8e-67  | gb AFC91721.1  putative odorant receptor OR12 [ <i>Cydia pomonella</i> ]         |
| CmedOR20  | KP975155         | unigene24580      | 118      | 5', 3' missing | 2   | 5e-67  | gij 669092426 gb AII01085.1  odorant receptors [ <i>Dendrolimus kikuchii</i> ]   |
| CmedOR21  | KP975156         | unigene7667       | 118      | 5' missing     | 1   | 1e-58  | gb AIG51873.1  odorant receptor [ <i>Helicoverpa armigera</i> ]                  |

doi:10.1371/journal.pone.0144267.t002

*medinalis* chemosensory genes that were missed in our assembly. Second, it is possible that the remaining OR and GR genes are either exclusively expressed in other olfactory organs such as maxillary palp (especially OR) or are temporally restricted to the developmental period (embryonic, larval, or pupal).



**Table 3. Unigenes of candidates for olfactory receptors.**

| Gene name | Accession number | Unigene reference | ORF (aa) | Status        | TMD | Evalue | Blastx best hit                                                          |
|-----------|------------------|-------------------|----------|---------------|-----|--------|--------------------------------------------------------------------------|
| CmedOR22  | KP975157         | unigene2843       | 115      | 5' missing    | 1   | 4e-35  | gb AI101110.1  odorant receptors [ <i>Dendrolimus kikuchii</i> ]         |
| CmedOR23  | KP975158         | unigene18065      | 99       | 3' missing    | 1   | 4e-26  | gb AIT69911.1  olfactory receptor 71 [ <i>Ctenopseustis herana</i> ]     |
| CmedOR24  | KP975159         | unigene35280      | 84       | 5' 3' missing | 1   | 7e-40  | gb AIG51878.1  odorant receptor, partial [ <i>Helicoverpa armigera</i> ] |

doi:10.1371/journal.pone.0144267.t003

### Identification of candidates for sensory neuron membrane proteins and ionotropic receptors

Sensory neuron membrane proteins (SNMPs), which are located in the dendritic membrane of primarily pheromone-specific OSNs, are thought to trigger ligand delivery to the receptor [32]. The two ‘discovered’ SNMPs share 100% sequence similarity with those reported previously [51].

The putative IR genes in the *C. medinalis* antennal transcriptome can be represented according to their similarity to known insect IRs. Bioinformatics analysis led to the identification of 15 IR candidates, in which three sequences contained a full-length ORF, and the remaining 12 sequences were fragments. Insect IRs have three trans-membrane domains, and TMHMM2.0 predicted the six candidates *C. medinalis* IR also have three trans-membrane domains (Table 4). For phylogenetic analysis, 13 of the putative *C. medinalis* IRs were aligned with orthologous IRs from *D. plexippus*, *B. mori*, *S. littoralis*, and *D. melanogaster*, the

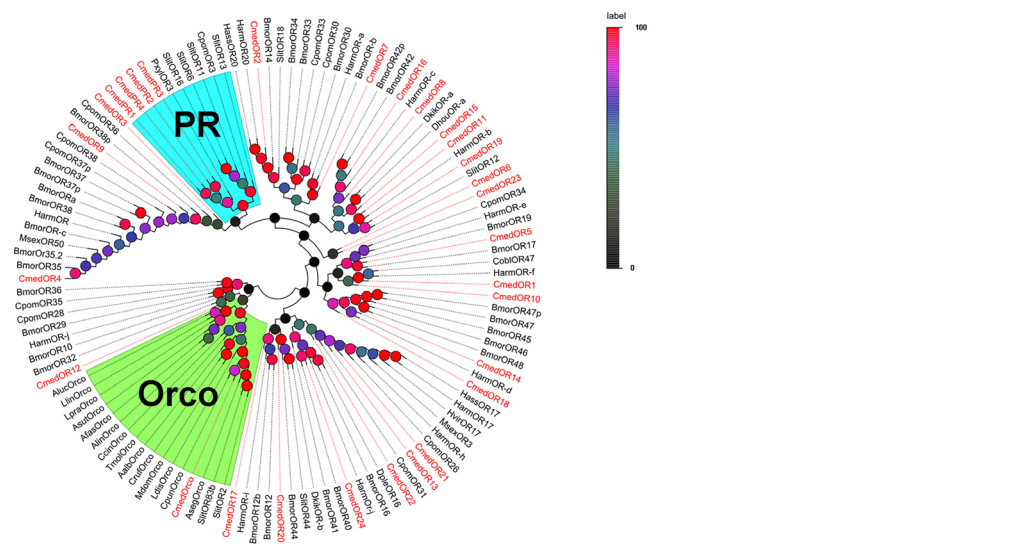

**Fig 2. Phylogenetic tree of candidate CmedORs with known OR sequences of other species.** Harm: *H. armigera*; Hvir: *H. virescens*; Bmor: *B. mori*; Pxyl: *P. xylostella*; Cpom: *Cydia pomonella*; Hass: *H. assulta*; Msex: *Manduca sexta*; Slii: *Spodoptera littoralis*; Dkik: *Dendrolimus kikuchii*; Dhou: *Dendrolimus houii*; Cobl: *Ctenopseustis obliquana*; Dple: *Danaus plexippus*; Alin: *Adelphocoris lineolatus*; Afas: *Adelphocoris fasciaticollis*; Asut: *Adelphocoris suturalis*; Lpra: *Lygus pratensis*; Llin: *Lygus lineolaris*; Aluc: *Apolygus lucorum*; Tmol: *Tenebrio molitor*; Ccin: *Cephus cinctus*; Mdom: *Musca domestica*; Cruf: *Chrysomya ruffifacies*; Aalb: *Aedes albopictus*; Ldis: *Lymantria disparasiatica*; Cpun: *Conogethes punctiferalis*; Aseg: *Agrotis segetum*; The clades in blue and in green indicate the pheromone receptor gene clade and the co-receptor gene clade respectively.

doi:10.1371/journal.pone.0144267.g002

**Table 4. Unigenes of candidates for ionotropic receptors.**

| Gene name   | Accession number | Unigene reference | ORF (aa) | Status         | TMD | Evalue | Blastx best hit                                                                                   |
|-------------|------------------|-------------------|----------|----------------|-----|--------|---------------------------------------------------------------------------------------------------|
| CmedIR93a   | KP975113         | CI8524            | 874      | Complete       | 4   | 0.0    | XP_004925511.1 glutamate receptor 2-like [ <i>Bombyx mori</i> ]                                   |
| CmedIR8a    | KP975100         | Unigene29958      | 849      | 5' missing     | 3   | 0.0    | gb AI101121.1  ionotropic receptors [ <i>Dendrolimus kikuchii</i> ]                               |
| CmedIR76b   | KP975099         | CI4160            | 552      | Complete       | 3   | 0.0    | XP_004927780.1 glutamate receptor ionotropic, delta-2-like isoform X1 [ <i>Bombyx mori</i> ]      |
| CmedIR75p.2 | KP975109         | CI8802            | 465      | 5', 3' missing | 3   | 0.0    | [gb ADR64684.1  putative chemosensory ionotropic receptor IR75p [ <i>Spodoptera littoralis</i> ]  |
| CmedIR75q.2 | KP975110         | Unigene842        | 434      | 5', 3' missing | 3   | 0.0    | gb AFC91752.1  putative ionotropic receptor IR75q2 [ <i>Cydia pomonella</i> ]                     |
| CmedIR87a   | KP975112         | Unigene11123      | 430      | Complete       | 3   | 0.0    | gb AFC91760.1  putative ionotropic glutamate receptor 87a, partial [ <i>Cydia pomonella</i> ]     |
| CmedIR75q.1 | KP975108         | CI4222            | 400      | 5' lost        | 3   | 2e-117 | [gb ADR64685.1  putative chemosensory ionotropic receptor IR75.2 [ <i>Spodoptera littoralis</i> ] |
| CmedIR21a.1 | KP975104         | Unigene15010      | 362      | 5' lost        | 2   | 4e-154 | gb AI101123.1  ionotropic receptors [ <i>Dendrolimus kikuchii</i> ]                               |
| CmedIR75p   | KP975101         | CI5125            | 324      | 5', 3' missing | 1   | 4e-119 | gb AI101128.1  ionotropic receptors [ <i>Dendrolimus kikuchii</i> ]                               |
| CmedIR21a.2 | KP975105         | Unigene34047      | 317      | 5', 3' missing | 1   | 0.0    | gb AI101123.1  ionotropic receptors [ <i>Dendrolimus kikuchii</i> ]                               |
| CmedIR1     | KP975111         | Unigene843        | 188      | 5', 3' missing | 1   | 3e-109 | gb AI101119.1  ionotropic receptors [ <i>Dendrolimus houi</i> ]                                   |
| CmedIR68a   | KP975107         | Unigene21319      | 149      | 5', 3' missing | 1   | 6e-70  | gb AIG51921.1  ionotropic receptor, partial [ <i>Helicoverpa armigera</i> ]                       |
| CmedIR3     | KP975102         | Unigene11279      | 114      | 5', 3' missing | 1   | 2e-40  | gb AI101118.1  ionotropic receptors, partial [ <i>Dendrolimus houi</i> ]                          |
| CmedIR41a   | KP975106         | Unigene42566      | 80       | 5', 3' missing | 1   | 9e-33  | gb ADR64681.1  putative chemosensory ionotropic receptor IR41a [ <i>Spodoptera littoralis</i> ]   |
| CmedIR4     | KP975103         | Unigene18142      | 78       | 5' missing     | 1   | 3e-37  | gb AIG51921.1  ionotropic receptor, partial [ <i>Helicoverpa armigera</i> ]                       |
| CmedSNMP1   | AFG73002         | CI7052            | 525      | complete       | 2   | 0.0    | gi 383215100 gb AFG73002.1  sensory neuron membrane protein 1 [ <i>Cnaphalocrocis medinalis</i> ] |
| CmedSNMP2   | AFG73003         | Unigene4172       | 520      | complete       | 1   | 0.0    | gi 383215102 gb AFG73003.1  sensory neuron membrane protein 2 [ <i>Cnaphalocrocis medinalis</i> ] |

doi:10.1371/journal.pone.0144267.t004

remaining two *C. medinalis* IR sequences were too short to align successfully. From the phylogenetic tree, we detected clear segregation between the different subfamilies, such as iGluR, IR75q, IR41a, and IR93a. In this phylogenetic tree, the most of *C. medinalis* IR candidates clustered with orthologous ionotropic receptors into separate clades (Fig 3). Based on their positions in the phylogenetic tree and strong bootstrap support, 12 of the 13 analyzed *C. medinalis* IRs candidates clustered with the IR8a, IR75p, IR75q, IR21a, IR41a, IR68a, IR76b, IR87a, and IR93a groups, which formed small expansions with other putative genes. Similar to previous reports [28, 31], IRs and iGluRs clustered phylogenetically into separate clades, with the exception of the IR8a and IR25a lineages, which clustered with the iGluRs. Unexpectedly, an orthologue of co-receptor IR25a, which is typically among the highest expressed IR transcripts in other insect antennae, was not found in our transcriptome.

This is the first report of IRs in *C. medinalis* and sequence alignments showed that the IRs are more highly conserved across species and orders than the ORs are. In our database, we identified fragments of putative IRs, which were specifically and highly expressed in the antennae of both sexes. Data for these genes, including unigene reference numbers, length, and best BLASTx hit for all the 15 IRs, are listed in Table 4. The sequences of all 15 IRs are listed in S1 File.

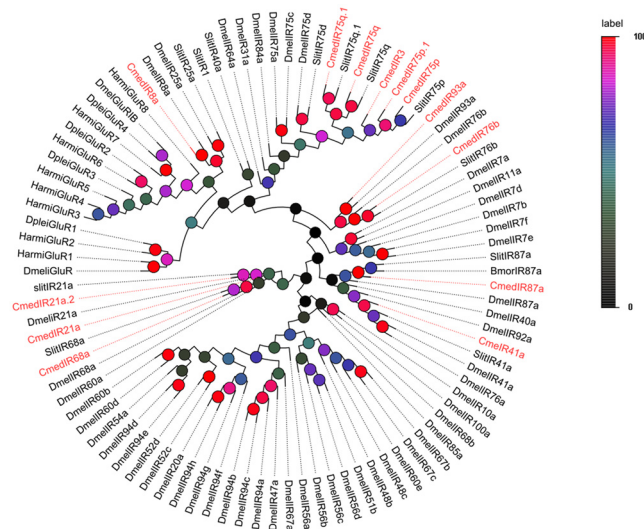

**Fig 3. Phylogenetic tree of candidate CmedIRs with known IR sequences of other species.** Harm: *H. armigera*; Hvir: *Bmor. B. mori*; Slit: *Spodoptera littoralis*, Dmel: *Drosophila melanogaster*.

doi:10.1371/journal.pone.0144267.g003

### Identification of putative odorant-binding proteins and chemosensory proteins

In addition to a keyword searching and PSI-Blast, we also used a motif scan for the conserved 6 cysteine residue pattern (C1-X<sub>5-39</sub>-C2-X<sub>3</sub>-C3-X<sub>21-44</sub>-C4-X<sub>7-12</sub>-C5-X<sub>8</sub>-C6) characteristic of odorant-binding proteins [52]. In our transcriptome data set, we identified 30 sequences that potentially encode odorant-binding proteins, including six previously annotated OBPs. Among these 30 sequences, 22 had an intact ORF detected, six unigenes lacked signal peptides and the other two were missing the 5' sequence. Sequence alignment showed that 15 of the 22 putative intact OBPs had the classic cysteine motif (Fig 4). The number of CmedOBPs candidate identified was far less than the 46 annotated OBPs found in the *B. mori* genome [53], but was more than the 18 putative OBPs identified in *M. sexta* [33]. In the phylogenetic tree, the PBP and GOBP sequences were clustered into the PBP and GOBP clades, respectively, as expected (Fig 5). All candidates for OBP sequences were clustered with at least one lepidopteran ortholog. By comparing our putative OBPs with the NCBI records for *C. medinalis*, we identified six previously annotated “genes”, GOBP1, GOBP2, GOBP3, PBP4, OBP1, and OBP2. All of the previously annotated sequences had >99% amino acid identity with their most similar NCBI records. Therefore, we named these candidates GOBPs and PBPs based on their existing NCBI records, and named the other OBP candidates “CmedOBP” followed by a number in descending order of their coding lengths (Tables 5 and 6).

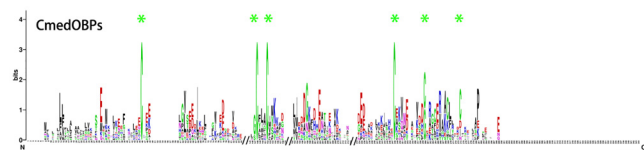

**Fig 4. CmedOBPs sequence logo.** Degree of amino acid sequence conservation along the primary sequence axis of *C. medinalis* odorant-binding proteins (OBPs). Depicted amino acid character size correlates to relative conservation across aligned sequences. Green asterisks indicate the conserved six cysteine motifs characteristic of OBPs.

doi:10.1371/journal.pone.0144267.g004

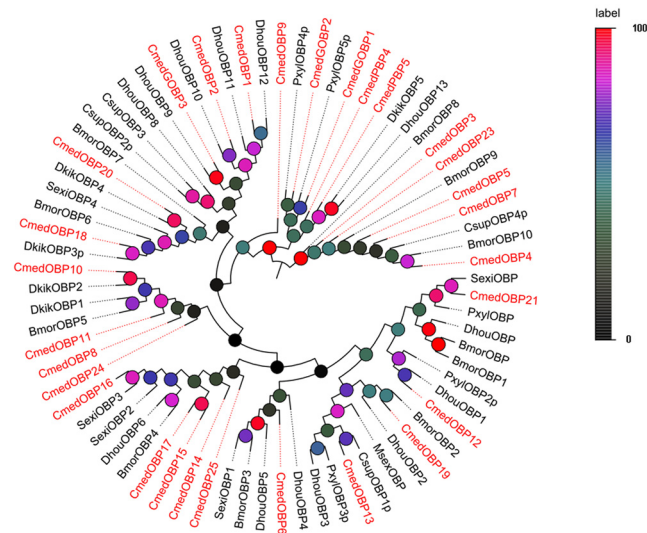

**Fig 5. Phylogenetic tree of candidate CmedOBPs with known OBP sequences of other species.** Harm: *H. armigera*; Hvir: *H. virescens*; Bmor: *B. mori*; Pxyl: *P. xylostella*; Hass: *H. assulta*; Msex: *Manduca sexta*, Sexi: *Spodoptera exigua*; Slit: *Spodoptera littoralis*; Dkik: *Dendrolimus kikuchii*; Dhou: *Dendrolimus houi*; Dple: *Danaus plexippus*; Csup: *Chilo suppressalis*.

doi:10.1371/journal.pone.0144267.g005

Bioinformatics analysis led to the identification of 26 sequences that encoded CSPs candidates (Fig 6). Among them, 20 sequences had full-length ORFs and signal peptides, which were found by using the SignalP test, except for CmedCSP15. Neighbor-joining tree analysis showed that all 26 sequences clustered with orthologous Lepidopteran genes (Fig 7). These CSP candidates were named “CmedCSPx” followed by a number in descending order of the length of the coding region. Information of the CSPs is presented in Table 7. The CSP sequences are listed in S1 File.

### Validation of tissue- and sex-specific expression of candidate chemosensory genes

In *C. medinalis*, all 29 ORs were expressed in antennae, 12 of which showed sex differentiation, with the expression level of CmedOR7, CmedOR14, CmedOR15 and CmedOR21 higher in female antennae than in male. Female-biased OR expression, as quantified using RNA-seq data, has also been reported for ORs expressed in the antennae of the adult mosquito, *Anopheles gambiae* [54] and other lepidopterans [55]. Three putative ORs were also expressed in legs and reproductive organs, respectively (Fig 8A), and CmedOrco was specifically expressed in adult antennae. Functional characterization of these male- and female-biased ORs, as well as members of the PR clade, remains to be conducted.

Unlike ORs, the expression of the IRs appeared to be similar between male and female (Fig 8D). We observed that some CmedIRs transcripts were not specific to chemosensory tissues, as 13 of the 15 candidate IRs showed exclusive expression in male and female antennae. Similar results were also observed in *S. littoralis* IRs [56]. The relatively high sequence conservation and expression of IRs implies a probable functional conservation. The antennal IRs are a novel group of chemosensory receptors. Additionally, CmedIR4 and CmedIR68a showed considerable expression in the male and female tarsus, respectively. In *D. melanogaster*, most of the 15 antennal IRs were found to be expressed only in antennae, two were also expressed in other

**Table 5. Unigenes of candidates for odorant binding proteins.**

| Gene name | Accession number | Unigene reference | ORF (aa) | status         | Signal peptide | E-value | BLASTx best hit                                                                                   |
|-----------|------------------|-------------------|----------|----------------|----------------|---------|---------------------------------------------------------------------------------------------------|
| CmedGOBP1 | AFG72996         | Cl3280.coontig1   | 163      | complete       | 19             | 5e-102  | gj 383215088 gb AFG72996.1  general odorant binding protein 1 [ <i>Cnaphalocrocis medinalis</i> ] |
| CmedGOBP2 | KC507183         | Cl9173.contig3    | 161      | complete       | 22             | 1e-108  | gj 472271932 gb AGI37366.1  general odorant-binding protein 2 [ <i>Cnaphalocrocis medinalis</i> ] |
| CmedGOBP3 | KC507179         | Unigene23178      | 173      | complete       | N              | 1e-97   | gj 472271924 gb AGI37362.1  general odorant-binding protein 3 [ <i>Cnaphalocrocis medinalis</i> ] |
| CmedPBP4  | KC507185         | Unigene4439       | 163      | complete       | N              | 3e-101  | gj 472271936 gb AGI37368.1  pheromone binding protein 4 [ <i>Cnaphalocrocis medinalis</i> ]       |
| CmedPBP5  | KP975161         | Unigene25298      | 169      | complete       | 26             | 1e-53   | gb ACX47891.1  pheromone-binding protein 2 F102 precursor [ <i>Amyelois transitella</i> ]         |
| CmedOBP1  | AFG72998         | Unigene26852      | 147      | complete       | 26             | 5e-99   | gj 383215092 gb AFG72998.1  odorant-binding protein 1 [ <i>Cnaphalocrocis medinalis</i> ]         |
| CmedOBP2  | AFG73000         | Unigene33027      | 129      | complete       | 18             | 1e-93   | gj 383215096 gb AFG73000.1  odorant-binding protein 2 [ <i>Cnaphalocrocis medinalis</i> ]         |
| CmedOBP3  | KP975114         | Unigene2099       | 256      | complete       | N              | 1e-74   | ref NP_001153663.1  odorant binding protein LOC100301495 precursor [ <i>Bombyx mori</i> ]         |
| CmedOBP4  | KP975115         | Unigene4118       | 254      | complete       | N              | 4e-134  | gb ADD71058.1  odorant-binding protein [ <i>Chilo suppressalis</i> ]                              |
| CmedOBP5  | KP975116         | Unigene29539      | 240      | complete       | 18             | 5e-77   | ref NP_001157372.1  odorant binding protein fmxg18C17 precursor [ <i>Bombyx mori</i> ]            |
| CmedOBP6  | KP975117         | Unigene19679      | 231      | complete       | 24             | 8e-75   | gb All00994.1  odorant binding protein [ <i>Dendrolimus kikuchii</i> ]                            |
| CmedOBP7  | KP975118         | Cl1968            | 223      | 5', 3' missing | —              | 2e-68   | gb EHJ70925.1  odorant binding protein fmxg18C17 [ <i>Danaus plexippus</i> ]                      |
| CmedOBP8  | KP975119         | Unigene44356      | 219      | complete       | 17             | 8e-70   | gb All54057.1  odorant-binding protein 21, partial [ <i>Chilo suppressalis</i> ]                  |
| CmedOBP9  | KP975120         | Unigene44227      | 204      | 5' missing     | —              | 3e-111  | gb AGK24579.1  odorant-binding protein 3 [ <i>Chilo suppressalis</i> ]                            |
| CmedOBP10 | KP975121         | Unigene6269       | 187      | complete       | 20             | 5e-51   | gb All01008.1  odorant binding protein [ <i>Dendrolimus kikuchii</i> ]                            |
| CmedOBP11 | KP975122         | Cl8457            | 171      | complete       | N              | 7e-72   | gb AGK24580.1  odorant-binding protein 4 [ <i>Chilo suppressalis</i> ]                            |
| CmedOBP12 | KP975123         | Cl3709            | 158      | 5', 3' missing | —              | 6e-38   | ref NP_001140188.1  odorant-binding protein 4 [ <i>Bombyx mori</i> ]                              |
| CmedOBP13 | KP975124         | Cl4036            | 152      | complete       | 22             | 1e-63   | gb AER27567.1  odorant binding protein [ <i>Chilo suppressalis</i> ]                              |
| CmedOBP14 | KP975125         | Unigene36228      | 149      | complete       | 25             | 2e-08   | gb AEB54582.1  OBP3 [ <i>Helicoverpa armigera</i> ]                                               |
| CmedOBP15 | KP975126         | Unigene22885      | 148      | complete       | 20             | 2e-15   | gb AAR28762.1  odorant-binding protein [ <i>Spodoptera frugiperda</i> ]                           |
| CmedOBP16 | KP975127         | Unigene11126      | 146      | complete       | 19             | 6e-50   | gb AGH70102.1  odorant binding protein 6 [ <i>Spodoptera exigua</i> ]                             |
| CmedOBP17 | KP975128         | Unigene33680      | 140      | complete       | 16             | 6e-08   | gb AFD34177.1  odorant binding protein 1 [ <i>Argyresthia conjugella</i> ]                        |
| CmedOBP18 | KP975129         | Unigene33154      | 137      | complete       | 18             | 2e-48   | gb All00979.1  odorant binding protein [ <i>Dendrolimus houi</i> ]                                |
| CmedOBP19 | KP975130         | Unigene34044      | 130      | 3' missing     | 20             | 4e-26   | gb AGP03455.1  SexiOBP9 [ <i>Spodoptera exigua</i> ]                                              |

doi:10.1371/journal.pone.0144267.t005

tissues, such as the proboscis [29]. And CsupIR3 and CsupIR64a have considerable expression in leg [37]. Thus, the chemosensory function of ORs and IRs might not be restricted to antennae (Fig 8B). In Lepidoptera, legs and ovipositors are known to carry contact chemosensory sensilla. For example, the ovipositor of the moth *H. virescens* has OR-expressing sensilla [57].

**Table 6. Unigenes of candidates for odorant binding proteins.**

| Gene name | Accession number | Unigene reference | ORF (aa) | status         | Signal peptide | E-value | BLASTx best hit                                                                                        |
|-----------|------------------|-------------------|----------|----------------|----------------|---------|--------------------------------------------------------------------------------------------------------|
| CmedOBP20 | KP975131         | Cl2821            | 123      | complete       | 16             | 9e-74   | gb AGK24578.1  odorant-binding protein 2 [ <i>Chilo suppressalis</i> ]                                 |
| CmedOBP21 | KP975132         | Unigene11641      | 114      | complete       | N              | 1e-62   | ref XP_004928230.1  PREDICTED: pheromone-binding protein-related protein 2-like [ <i>Bombyx mori</i> ] |
| CmedOBP22 | KP975133         | Unigene24577      | 110      | 5', 3' missing | —              | 9e-24   | ref NP_001157372.1  odorant binding protein fmxg18C17 precursor [ <i>Bombyx mori</i> ]                 |
| CmedOBP23 | KP975134         | Unigene36708      | 106      | 5' missing     | —              | 4e-21   | ref NP_001157372.1  odorant binding protein fmxg18C17 precursor [ <i>Bombyx mori</i> ]                 |
| CmedOBP24 | KP975135         | Unigene43762      | 99       | 5' missing     | —              | 3e-57   | gb EHJ74351.1  odorant-binding protein 2 [ <i>Danaus plexippus</i> ]                                   |
| CmedOBP25 | KP987795         | Unigene37903      | 93       | 5' missing     | —              | 4e-06   | gb AGC92789.1  odorant-binding protein 9 [ <i>Helicoverpa assulta</i> ]                                |

doi:10.1371/journal.pone.0144267.t006

Taken together, these observations suggest that, although classified as antennal IRs, some IRs might be involved in functions other than chemoreception [56].

Compared with the chemoreception genes of *C. medinalis* previously submitted to NCBI, most of those sequences were found in our data and the expression patterns of these genes in different tissues were nearly identical. In addition, we identified 13 new CSP genes, 11 of which were only expressed in the female protarsus, the remaining two were also expressed in the male protarsus and one was expressed in the male reproductive organs (Fig 9C). In total, 12 OBP genes were exclusively expressed in antennae and four in the female tarsus. In addition, CmedOBP6 and CmedOBP12 were also expressed in the male reproductive organs; and CmedOBP16 and CmedOBP24 showed sex differentiation (Fig 9B). The high expression levels in male antenna could help male moths to identify sex pheromones emitted by female moths. In many species, soluble PBP in the sensillum lymph surrounding the dendrites are thought to transfer the usually hydrophobic pheromone molecules to the dendrite membrane of the sensory neurons [58], and are male biased in expression [59, 60]. Several studies supported the role of PBP in pheromone detection, since female moths release a blend of sex pheromones to attract males over long distances, and males detect the released pheromones with extreme sensitivity and selectivity [61], PBP though are not the only protein that can bind sex pheromones, OBPs and CSPs also function in this. Labeling was observed in antennae sensilla chaetica, but not in olfactory sensilla or sensilla coeloconica, leading to the suggestion that in Orthoptera, CSPs are involved in contact chemoreception. This may also apply to Lepidoptera as BmorCSP4 was higher expressed in contact organs (antennae, legs, and wings) than non-contact organs (head, thorax and abdomen); many insects have high expression levels in antennae, legs and wings but lower levels in the abdomen, thorax and head for both sexes [62].

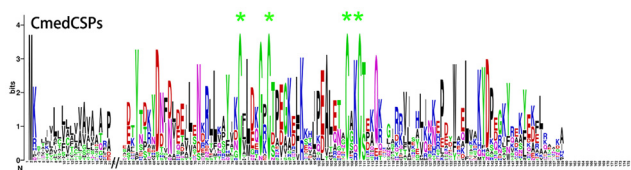

**Fig 6. CmedCSPs sequence logo.** Degree of amino acid sequence conservation along the primary sequence axis of *C. medinalis* chemosensory proteins (CSPs). Depicted amino acid character size correlates to relative conservation across aligned sequences. Green asterisks indicate the conserved four cysteine motifs characteristic of CSPs.

doi:10.1371/journal.pone.0144267.g006

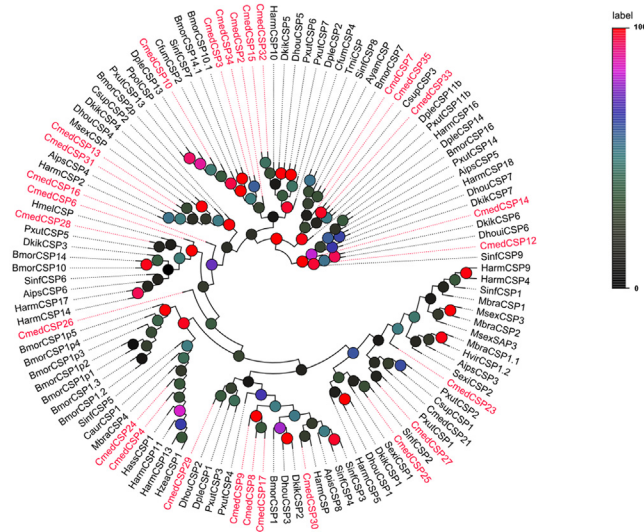

**Fig 7. Phylogenetic tree of candidate CmedCSPs with known CSP sequences of other species.** Harm: *H. armigera*; Hvir: *H. virescens*; Bmor: *B. mori*; Pxyl: *P. xylostella*; Hass: *H. assulta*; Hzea: *Helicoverpa zea*; Msex: *Manduca sexta*, Mbra: *Mamestra brassicae*; Slit: *Spodoptera littoralis*; Sexi: *Spodoptera exigua*; Dkik: *Dendrolimus kikuchii*; Dhou: *Dendrolimus houi*; Dple: *Danaus plexippus*; Apis: *Agrotis ipsilon*; Sinf: *Sesamia inferens*; Csup: *Chilo suppressalis*; Caur: *Chilo auricilius*; Cfum: *Choristoneura fumiferana*; Trni: *Trichoplusia ni*; Ayam: *Antheraea yamamai*; Ppol: *Papilio polytes*.

doi:10.1371/journal.pone.0144267.g007

Furthermore, among insects many adult females do not automatically oviposit once they have reached the spawning place, initial determination of host suitability may occur through the tarsal sensilla [63]. In *C. medinalis*, four OBPs and 12 CSPs were identified that were expressed exclusively in female protarsus, which may function in host plant discrimination. We speculate that prior to oviposition, females assess the suitability of leaf surfaces with their legs. This behavior may help to characterize the function of these proteins in future research. In the Mediterranean fruit fly, *Ceratitidis capitata*, CcapOBP99d is abundant in the antennae, but also present in tarsi, wings and male abdomen [61].

To validate the expression patterns of candidate genes, eight genes including two OBPs, two CSPs, and four ORs were selected and analyzed by qRT-PCR. The qRT-PCR amplicons were sequenced directly after amplification and show  $\geq 99\%$  identical at the nucleic acid level with the corresponding sequences from the transcriptome, indicating that the assembly of the transcripts was reliable. The expression levels were consistent with the initial FPKM calculation (Fig 8), which further supported the validity of our data.

### Conclusion

The main objective of this study was to investigate the transcriptome of the major chemosensory organs in the rice leaf folder *C. medinalis*. Using RNA-sequencing, we annotated a total of 30 candidate OBPs, 14 CSPs, 36 ORs, 15 IRs, and 2 SNMPs in the antennae of *C. medinalis*. Most of the previously annotated *C. medinalis* chemosensory genes available in NCBI were also found in our dataset. Prior to this study, members of the major chemosensory genes had only been identified in the antennae of *C. medinalis*, and no ORs or IRs were identified. This strategy is particularly relevant for the identification of new insect chemosensory receptors in species for which no genomic data is available. The availability of our large antennal transcriptome represents a valuable resource for further studies on insect olfaction in this species as well as other lepidopterans.

**Table 7. Unigenes of candidates for chemosensory proteins.**

| Gene name | Accession number | Unigene reference | ORF (aa) | Status     | Signal peptide | E-value | BLASTx best hit                                                                        |
|-----------|------------------|-------------------|----------|------------|----------------|---------|----------------------------------------------------------------------------------------|
| CmedCSP2  | KC507180         | Unigene26762      | 124aa    | complete   | 16             | 6e-72   | gi 472271926 gb AGI37363.1  chemosensory protein 2 [ <i>Cnaphalocrocis medinalis</i> ] |
| CmedCSP3  | KC507182         | Cl2512.contig2    | 123aa    | complete   | 17             | 4e-66   | gi 472271930 gb AGI37365.1  chemosensory protein 3 [ <i>Cnaphalocrocis medinalis</i> ] |
| CmedCSP4  | KM365188         | Unigene4140       | 131aa    | complete   | 18             | 5e-75   | gi 723592548 gb AIX97823.1 chemosensory protein [ <i>Cnaphalocrocis medinalis</i> ]    |
| CmedCSP6  | KM365190         | Unigene16713      | 129aa    | complete   | 18             | 1e-80   | gi 723592548 gb AIX97825.1 chemosensory protein [ <i>Cnaphalocrocis medinalis</i> ]    |
| CmedCSP7  | KM365191         | Unigene29759      | 123aa    | complete   | 19             | 6e-69   | gi 723592548 gb AIX97826.1 chemosensory protein [ <i>Cnaphalocrocis medinalis</i> ]    |
| CmedCSP10 | KM365194         | Unigene7213       | 121aa    | complete   | 17             | 2e-75   | gi 723592548 gb AIX97829.1 chemosensory protein [ <i>Cnaphalocrocis medinalis</i> ]    |
| CmedCSP12 | KM365196         | Unigene11453      | 105aa    | complete   | 18             | 5e-54   | gi 723592548 gb AIX97831.1 chemosensory protein [ <i>Cnaphalocrocis medinalis</i> ]    |
| CmedCSP13 | KM365197         | Cl270.coontig1    | 120aa    | complete   | 16             | 3e-60   | gi 723592548 gb AIX97832.1  chemosensory protein [ <i>Cnaphalocrocis medinalis</i> ]   |
| CmedCSP15 | AIX97837         | Unigene22875      | 120aa    | complete   | No             | 2e-72   | gi 723592548 gb AIX97837.1 chemosensory protein [ <i>Cnaphalocrocis medinalis</i> ]    |
| CmedCSP14 | KM365198         | CL1055.Contig1    | 108aa    | complete   | 18             | 2e-47   | gi 669092282 gb AII01013.1  chemosensory proteins [ <i>Dendrolimus houi</i> ]          |
| CmedCSP16 | KM365200         | Unigene26507      | 144a     | complete   | 19             | 1e-79   | gi 723592548 gb AIX97835.1 chemosensory protein [ <i>Cnaphalocrocis medinalis</i> ]    |
| CmedCSP17 | KM365201         | Cl5537            | 157aa    | complete   | 18             | 7e-69   | gi 723592548 gb AIX97836.1 chemosensory protein [ <i>Cnaphalocrocis medinalis</i> ]    |
| CmedCSP21 | KM365205         | Unigene22979      | 128aa    | complete   | 18             | 2e-77   | gi 723592548 gb AIX97840.1 chemosensory protein [ <i>Cnaphalocrocis medinalis</i> ]    |
| CmedCSP23 | KP975086         | Unigene34455      | 128aa    | complete   | 18             | 5e-56   | gi 524903053 gb AGR39573.1  chemosensory protein 3 [ <i>Agrotis ipsilon</i> ]          |
| CmedCSP24 | KP975087         | Unigene36321      | 127aa    | complete   | 16             | 2e-71   | gi 82792665 gb ABB91378.1  chemosensory protein [ <i>Helicoverpa assulta</i> ]         |
| CmedCSP25 | KP975088         | Unigene38001      | 127aa    | complete   | 18             | 6e-59   | gi 552955226 gb AGY49267.1 putative chemosensory protein [ <i>Sesamia inferens</i> ]   |
| CmedCSP26 | KP975089         | Unigene36705      | 124aa    | 3' missing | 18             | 3e-40   | gi 122894082 gb ABM67687.1  chemosensory protein CSP2 [ <i>Plutella xylostella</i> ]   |
| CmedCSP27 | KP975090         | Unigene37675      | 124aa    | 3' missing | 16             | 5e-44   | gi 122894086 gb ABM67689.1  chemosensory protein CSP2 [ <i>Spodoptera exigua</i> ]     |
| CmedCSP28 | KP975091         | CL5373.Contig1    | 124aa    | complete   | 18             | 2e-54   | gi 712120529 gb AIW65099.1  chemosensory protein [ <i>Helicoverpa armigera</i> ]       |
| CmedCSP29 | KP975092         | Unigene10982      | 123aa    | complete   | 19             | 3e-44   | gi 158962509 dbj BAF91715.1  chemosensory protein [ <i>Papilio xuthus</i> ]            |
| CmedCSP30 | KP975093         | Unigene38015      | 123aa    | 3' missing | 18             | 2e-53   | gi 524903217 gb AGR39578.1  chemosensory protein 8 [ <i>Agrotis ipsilon</i> ]          |
| CmedCSP31 | KP975094         | Unigene37928      | 121aa    | complete   | 16             | 7e-62   | gi 365919036 gb AEX07265.1  CSP2 [ <i>Helicoverpa armigera</i> ]                       |
| CmedCSP32 | KP975095         | cl3683.contig2_   | 120aa    | 3' missing | 16             | 1e-73   | ref NP_001140188.1  odorant-binding protein 4 [ <i>Bombyx mori</i> ]                   |
| CmedCSP33 | KP975096         | cl1009.contig2    | 120aa    | complete   | 16             | 6e-51   | gi 564969460 gb AHC05672.1 chemosensory protein, partial [ <i>Chilo suppressalis</i> ] |
| CmedCSP34 | KP975097         | Unigene37060      | 112aa    | 3' missing | 16             | 4e-50   | gi 365919040 gb AEX07267.1  CSP6 [ <i>Helicoverpa armigera</i> ]                       |
| CmedCSP35 | KP975098         | Unigene36273      | 99aa     | 3' missing | 16             | 2e-29   | gi 405117272 gb AFR92092.1  chemosensory protein 8 [ <i>Helicoverpa armigera</i> ]     |

doi:10.1371/journal.pone.0144267.t007



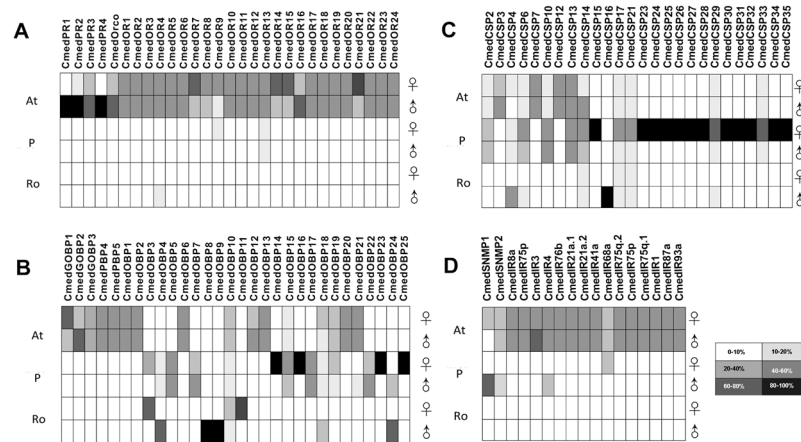

**Fig 8. Comparison of OBP, OR, CSPs, SNMPs, and IRs expression based on FPKM values in male and female adult *C. medinalis* chemosensory tissues.** (A) The common set of ORs expressed in each tissue in both males and females. (B) The common set of OBPs expressed in each tissue in both males and females. (C) The common set of CSPs expressed in each tissue in both males and females. (D) The common set of ORs expressed in each tissue in both males and females. The antennal libraries included both antennae, the protarsus libraries included the tarsus of six legs, and the reproductive organ included the last three abdominal sections.

doi:10.1371/journal.pone.0144267.g008

Although the generation of gender-specific transcriptomes did not highlight strong differences between sexes, we found evidence for female-enriched ORs. A comparison of the transcriptomes in major chemosensory organs from males and females that have encountered diverse experiences might lead to the identification of more regulated genes, such as candidates for genes involved in gender-specific behaviors and make it possible for further research into the *C. medinalis* olfactory system at the molecular level. These studies can also provide information for comparative and functional genomic analyses of related species.

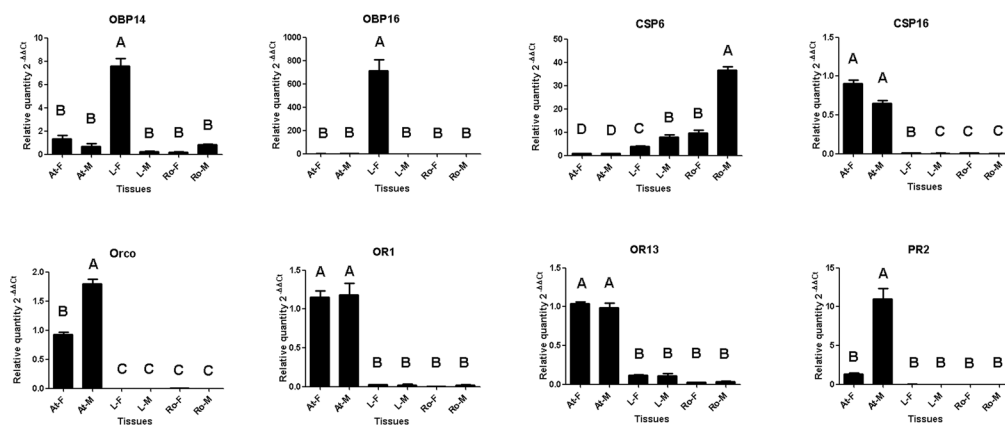

**Fig 9. Expression levels of eight selected genes based on qPCR in different tissues.** F: female; M: male; At: antennae; P: protarsus; Ro: reproductive organ. Different letters above bars indicate significant differences in expression levels between tissues.

doi:10.1371/journal.pone.0144267.g009

## Supporting Information

**S1 Fig. The FPKM of candidate chemoreception proteins in different tissues.**

(TIF)

**S1 File. Amino acid sequences of *C. medinalis* olfactory genes.**

(DOC)

**S1 Table. Primers used in the quantitative real-time PCR analysis.**

(DOCX)

## Author Contributions

Conceived and designed the experiments: F-FZ M-QW. Performed the experiments: F-FZ Z-FZ M-JY WZ. Analyzed the data: F-FZ Z-FZ ZZ M-QW. Contributed reagents/materials/analysis tools: F-FZ M-QW. Wrote the paper: F-FZ AZ Z-XL M-QW.

## References

1. Khan Z, Barrion A, Litsinger J, Castilla N, Joshi R. Mini review. A bibliography of rice leaffolders (Lepidoptera: Pyralidae). *Insect Sci Appl*. 1988; 9(2):129–74.
2. Padmavathi C, Katti G, Padmakumari A, Voleti S, Subba Rao L. The effect of leaffolder *Cnaphalocrocis medinalis* (Guenee)[Lepidoptera: Pyralidae] injury on the plant physiology and yield loss in rice. *Journal of Applied Entomology*. 2013; 137(4):249–56.
3. Sato K, Touhara K. Insect olfaction: receptors, signal transduction, and behavior. *Chemosensory systems in mammals, fishes, and insects*: Springer; 2009. p. 203–20.
4. Morita H, Shiraishi A. Chemoreception physiology. *Comprehensive insect physiology, biochemistry and pharmacology*. 1985; 6:133–70.
5. Wannier K, Robertson H. The gustatory receptor family in the silkworm moth *Bombyx mori* is characterized by a large expansion of a single lineage of putative bitter receptors. *Insect molecular biology*. 2008; 17(6):621–9. doi: [10.1111/j.1365-2583.2008.00836.x](https://doi.org/10.1111/j.1365-2583.2008.00836.x) PMID: [19133074](https://pubmed.ncbi.nlm.nih.gov/19133074/)
6. Leal WS. Odorant reception in insects: roles of receptors, binding proteins, and degrading enzymes. *Annual review of entomology*. 2013; 58:373–91. doi: [10.1146/annurev-ento-120811-153635](https://doi.org/10.1146/annurev-ento-120811-153635) PMID: [23020622](https://pubmed.ncbi.nlm.nih.gov/23020622/)
7. Hallem EA, Dahanukar A, Carlson JR. Insect odor and taste receptors. *Annu Rev Entomol*. 2006; 51:113–35. PMID: [16332206](https://pubmed.ncbi.nlm.nih.gov/16332206/)
8. Korsching S. Olfactory maps and odor images. *Current opinion in neurobiology*. 2002; 12(4):387–92. PMID: [12139985](https://pubmed.ncbi.nlm.nih.gov/12139985/)
9. Pelosi P, Zhou J-J, Ban L, Calvello M. Soluble proteins in insect chemical communication. *Cellular and Molecular Life Sciences CMLS*. 2006; 63(14):1658–76. PMID: [16786224](https://pubmed.ncbi.nlm.nih.gov/16786224/)
10. Jacquin-Joly E, Merlin C. Insect olfactory receptors: contributions of molecular biology to chemical ecology. *Journal of chemical ecology*. 2004; 30(12):2359–97. PMID: [15724962](https://pubmed.ncbi.nlm.nih.gov/15724962/)
11. Rogers ME, Sun M, Lerner MR, Vogt RG. Snmp-1, a novel membrane protein of olfactory neurons of the silk moth *Antheraea polyphemus* with homology to the CD36 family of membrane proteins. *Journal of Biological Chemistry*. 1997; 272(23):14792–9. PMID: [9169446](https://pubmed.ncbi.nlm.nih.gov/9169446/)
12. Vogt RG, Miller NE, Litvack R, Fandino RA, Sparks J, Staples J, et al. The insect SNMP gene family. *Insect biochemistry and molecular biology*. 2009; 39(7):448–56. doi: [10.1016/j.ibmb.2009.03.007](https://doi.org/10.1016/j.ibmb.2009.03.007) PMID: [19364529](https://pubmed.ncbi.nlm.nih.gov/19364529/)
13. Calvello M, Brandazza A, Navarrini A, Dani F, Turillazzi S, Felicioli A, et al. Expression of odorant-binding proteins and chemosensory proteins in some *Hymenoptera*. *Insect biochemistry and molecular biology*. 2005; 35(4):297–307. PMID: [15763466](https://pubmed.ncbi.nlm.nih.gov/15763466/)
14. Xu Y-L, He P, Zhang L, Fang S-Q, Dong S-L, Zhang Y-J, et al. Large-scale identification of odorant-binding proteins and chemosensory proteins from expressed sequence tags in insects. *BMC genomics*. 2009; 10(1):632.
15. Jacquin-Joly E, Vogt RG, François M-C, Nagnan-Le Meillour P. Functional and expression pattern analysis of chemosensory proteins expressed in antennae and pheromonal gland of *Mamestra brassicae*. *Chemical Senses*. 2001; 26(7):833–44. PMID: [11555479](https://pubmed.ncbi.nlm.nih.gov/11555479/)

16. Briand L, Swasdipan N, Nespoulos C, Bézirard V, Blon F, Huet JC, et al. Characterization of a chemosensory protein (ASP3c) from honeybee (*Apis mellifera* L.) as a brood pheromone carrier. *European Journal of Biochemistry*. 2002; 269(18):4586–96. PMID: [12230571](#)
17. Kitabayashi AN, Arai T, Kubo T, Natori S. Molecular cloning of cDNA for p10, a novel protein that increases in the regenerating legs of *Periplaneta americana* (American cockroach). *Insect biochemistry and molecular biology*. 1998; 28(10):785–90. PMID: [9807224](#)
18. Gong L, Luo Q, Rizwan-ul-Haq M, Hu M-Y. Cloning and characterization of three chemosensory proteins from *Spodoptera exigua* and effects of gene silencing on female survival and reproduction. *Bulletin of entomological research*. 2012; 102(05):600–9.
19. Mombaerts P. Seven-transmembrane proteins as odorant and chemosensory receptors. *Science*. 1999; 286(5440):707–11. PMID: [10531047](#)
20. Larsson MC, Domingos AI, Jones WD, Chiappe ME, Amrein H, Vosshall LB. Or83b encodes a broadly expressed odorant receptor essential for *Drosophila* olfaction. *Neuron*. 2004; 43(5):703–14. PMID: [15339651](#)
21. Benton R, Sachse S, Michnick SW, Vosshall LB. Atypical membrane topology and heteromeric function of *Drosophila* odorant receptors in vivo. *PLoS biology*. 2006; 4(2):e20. PMID: [16402857](#)
22. Krieger J, Klink O, Mohl C, Raming K, Breer H. A candidate olfactory receptor subtype highly conserved across different insect orders. *Journal of Comparative Physiology A*. 2003; 189(7):519–26.
23. Sun M, Liu Y, Walker WB, Liu C, Lin K, Gu S, et al. Identification and characterization of pheromone receptors and interplay between receptors and pheromone binding proteins in the diamondback moth, *Plutella xylostella*. 2013.
24. Zhang D-D, Zhu KY, Wang C-Z. Sequencing and characterization of six cDNAs putatively encoding three pairs of pheromone receptors in two sibling species, *Helicoverpa armigera* and *Helicoverpa assulta*. *Journal of insect physiology*. 2010; 56(6):586–93. doi: [10.1016/j.jinsphys.2009.12.002](#) PMID: [19962987](#)
25. Montagné N, Chertemps T, Brigaud I, François A, François MC, De Fouchier A, et al. Functional characterization of a sex pheromone receptor in the pest moth *Spodoptera littoralis* by heterologous expression in *Drosophila*. *European Journal of Neuroscience*. 2012; 36(5):2588–96. doi: [10.1111/j.1460-9568.2012.08183.x](#) PMID: [22748123](#)
26. Bengtsson JM, Trona F, Montagné N, Anfara G, Ignell R, Witzgall P, et al. Putative chemosensory receptors of the codling moth, *Cydia pomonella*, identified by antennal transcriptome analysis. *PloS one*. 2012; 7(2):e31620. doi: [10.1371/journal.pone.0031620](#) PMID: [22363688](#)
27. Liu C, Liu Y, Walker WB, Dong S, Wang G. Identification and functional characterization of sex pheromone receptors in beet armyworm *Spodoptera exigua* (Hübner). *Insect biochemistry and molecular biology*. 2013; 43(8):747–54. doi: [10.1016/j.ibmb.2013.05.009](#) PMID: [23751753](#)
28. Benton R. Evolution and revolution in odor detection. *Science*. 2009; 326(5951):382–3. doi: [10.1126/science.1181998](#) PMID: [19833953](#)
29. Benton R, Vannice KS, Gomez-Diaz C, Vosshall LB. Variant ionotropic glutamate receptors as chemosensory receptors in *Drosophila*. *Cell*. 2009; 136(1):149–62. doi: [10.1016/j.cell.2008.12.001](#) PMID: [19135896](#)
30. Ai M, Blais S, Park J-Y, Min S, Neubert TA, Suh GS. Ionotropic glutamate receptors IR64a and IR8a form a functional odorant receptor complex in vivo in *Drosophila*. *The Journal of Neuroscience*. 2013; 33(26):10741–9. doi: [10.1523/JNEUROSCI.5419-12.2013](#) PMID: [23804096](#)
31. Croset V, Rytz R, Cummins SF, Budd A, Brawand D, Kaessmann H, et al. Ancient protostome origin of chemosensory ionotropic glutamate receptors and the evolution of insect taste and olfaction. *PLoS genetics*. 2010; 6(8):e1001064. doi: [10.1371/journal.pgen.1001064](#) PMID: [20808886](#)
32. Nichols Z, Vogt RG. The SNMP/CD36 gene family in Diptera, Hymenoptera and Coleoptera: *Drosophila melanogaster*, *D. pseudoobscura*, *Anopheles gambiae*, *Aedes aegypti*, *Apis mellifera*, and *Tribolium castaneum*. *Insect biochemistry and molecular biology*. 2008; 38(4):398–415. doi: [10.1016/j.ibmb.2007.11.003](#) PMID: [18342246](#)
33. Grosse-Wilde E, Kuebler LS, Bucks S, Vogel H, Wicher D, Hansson BS. Antennal transcriptome of *Manduca sexta*. *Proceedings of the National Academy of Sciences*. 2011; 108(18):7449–54.
34. Sakurai T, Nakagawa T, Mitsuno H, Mori H, Endo Y, Tanoue S, et al. Identification and functional characterization of a sex pheromone receptor in the silkworm *Bombyx mori*. *Proceedings of the National Academy of Sciences of the United States of America*. 2004; 101(47):16653–8. PMID: [15545611](#)
35. Liu Y, Gu S, Zhang Y, Guo Y, Wang G. Candidate olfaction genes identified within the *Helicoverpa armigera* antennal transcriptome. *PloS one*. 2012; 7(10):e48260. doi: [10.1371/journal.pone.0048260](#) PMID: [23110222](#)

36. Zhang Y-N, Jin J-Y, Jin R, Xia Y-H, Zhou J-J, Deng J-Y, et al. Differential expression patterns in chemosensory and non-chemosensory tissues of putative chemosensory genes identified by transcriptome analysis of insect pest the purple stem borer *Sesamia inferens* (Walker). PloS one. 2013; 8(7):e69715. doi: [10.1371/journal.pone.0069715](https://doi.org/10.1371/journal.pone.0069715) PMID: [23894529](https://pubmed.ncbi.nlm.nih.gov/23894529/)
37. Depan Cao YL, Wei J, Liao X, Walker WB, Li J, Wang G. Identification of Candidate Olfactory Genes in *Chilo suppressalis* by Antennal Transcriptome Analysis. International journal of biological sciences. 2014; 10(8):846. doi: [10.7150/ijbs.9297](https://doi.org/10.7150/ijbs.9297) PMID: [25076861](https://pubmed.ncbi.nlm.nih.gov/25076861/)
38. Jacquin-Joly E, Legeai F, Montagné N, Monsemper C, François M-C, Poulain J, et al. Candidate chemosensory genes in female antennae of the noctuid moth *Spodoptera littoralis*. International journal of biological sciences. 2012; 8(7):1036. doi: [10.7150/ijbs.4469](https://doi.org/10.7150/ijbs.4469) PMID: [22904672](https://pubmed.ncbi.nlm.nih.gov/22904672/)
39. Gong D-P, Zhang H-J, Zhao P, Xia Q-Y, Xiang Z-H. The odorant binding protein gene family from the genome of silkworm, *Bombyx mori*. BMC genomics. 2009; 10(1):332.
40. Pelletier J, Leal WS. Characterization of olfactory genes in the antennae of the Southern house mosquito, *Culex quinquefasciatus*. Journal of insect physiology. 2011; 57(7):915–29. doi: [10.1016/j.jinsphys.2011.04.003](https://doi.org/10.1016/j.jinsphys.2011.04.003) PMID: [21504749](https://pubmed.ncbi.nlm.nih.gov/21504749/)
41. Forêt S, Maleszka R. Function and evolution of a gene family encoding odorant binding-like proteins in a social insect, the honey bee (*Apis mellifera*). Genome research. 2006; 16(11):1404–13. PMID: [17065610](https://pubmed.ncbi.nlm.nih.gov/17065610/)
42. Zeng F-F, Sun X, Dong H-B, Wang M-Q. Analysis of a cDNA library from the antenna of *Cnaphalocrocis medinalis* and the expression pattern of olfactory genes. Biochemical and biophysical research communications. 2013; 433(4):463–9. doi: [10.1016/j.bbrc.2013.03.038](https://doi.org/10.1016/j.bbrc.2013.03.038) PMID: [23523786](https://pubmed.ncbi.nlm.nih.gov/23523786/)
43. Grabherr MG, Haas BJ, Yassour M, Levin JZ, Thompson DA, Amit I, et al. Full-length transcriptome assembly from RNA-Seq data without a reference genome. Nature biotechnology. 2011; 29(7):644–52. doi: [10.1038/nbt.1883](https://doi.org/10.1038/nbt.1883) PMID: [21572440](https://pubmed.ncbi.nlm.nih.gov/21572440/)
44. Pertea G, Huang X, Liang F, Antonescu V, Sultana R, Karamycheva S, et al. TIGR Gene Indices clustering tools (TGICL): a software system for fast clustering of large EST datasets. Bioinformatics. 2003; 19(5):651–2. PMID: [12651724](https://pubmed.ncbi.nlm.nih.gov/12651724/)
45. Conesa A, Götz S, García-Gómez JM, Terol J, Talón M, Robles M. Blast2GO: a universal tool for annotation, visualization and analysis in functional genomics research. Bioinformatics. 2005; 21(18):3674–6. PMID: [16081474](https://pubmed.ncbi.nlm.nih.gov/16081474/)
46. Trapnell C, Williams BA, Pertea G, Mortazavi A, Kwan G, van Baren MJ, et al. Transcript assembly and quantification by RNA-Seq reveals unannotated transcripts and isoform switching during cell differentiation. Nature biotechnology. 2010; 28(5):511–5. doi: [10.1038/nbt.1621](https://doi.org/10.1038/nbt.1621) PMID: [20436464](https://pubmed.ncbi.nlm.nih.gov/20436464/)
47. Li R, Yu C, Li Y, Lam T-W, Yiu S-M, Kristiansen K, et al. SOAP2: an improved ultrafast tool for short read alignment. Bioinformatics. 2009; 25(15):1966–7. doi: [10.1093/bioinformatics/btp336](https://doi.org/10.1093/bioinformatics/btp336) PMID: [19497933](https://pubmed.ncbi.nlm.nih.gov/19497933/)
48. Atteson K. The performance of neighbor-joining methods of phylogenetic reconstruction. Algorithmica. 1999; 25(2–3):251–78.
49. Livak KJ, Schmittgen TD. Analysis of relative gene expression data using real-time quantitative PCR and the 2– $\Delta\Delta$ CT method. methods. 2001; 25(4):402–8. PMID: [11846609](https://pubmed.ncbi.nlm.nih.gov/11846609/)
50. Berg BG, Galizia CG, Brandt R, Mustaparta H. Digital atlases of the antennal lobe in two species of tobacco budworm moths, the oriental *Helicoverpa assulta* (male) and the American *Heliothis virescens* (male and female). Journal of Comparative Neurology. 2002; 446(2):123–34. PMID: [11932931](https://pubmed.ncbi.nlm.nih.gov/11932931/)
51. Liu S, Zhang YR, Zhou WW, Liang QM, Yuan X, Cheng J, et al. Identification and characterization of two sensory neuron membrane proteins from *Cnaphalocrocis medinalis* (Lepidoptera: Pyralidae). Archives of insect biochemistry and physiology. 2013; 82(1):29–42. doi: [10.1002/arch.21069](https://doi.org/10.1002/arch.21069) PMID: [23027616](https://pubmed.ncbi.nlm.nih.gov/23027616/)
52. Zhou JJ, He XL, Pickett J, Field L. Identification of odorant-binding proteins of the yellow fever mosquito *Aedes aegypti*: genome annotation and comparative analyses. Insect molecular biology. 2008; 17(2):147–63. doi: [10.1111/j.1365-2583.2007.00789.x](https://doi.org/10.1111/j.1365-2583.2007.00789.x) PMID: [18353104](https://pubmed.ncbi.nlm.nih.gov/18353104/)
53. Adams MD, Celniker SE, Holt RA, Evans CA, Gocayne JD, Amanatides PG, et al. The genome sequence of *Drosophila melanogaster*. Science. 2000; 287(5461):2185–95. PMID: [10731132](https://pubmed.ncbi.nlm.nih.gov/10731132/)
54. Pitts RJ, Rinker DC, Jones PL, Rokas A, Zwiebel LJ. Transcriptome profiling of chemosensory appendages in the malaria vector *Anopheles gambiae* reveals tissue- and sex-specific signatures of odor coding. BMC genomics. 2011; 12(1):271.
55. Corcoran JA, Jordan MD, Thrimawithana AH, Crowhurst RN, Newcomb RD. The Peripheral Olfactory Repertoire of the Lightbrown Apple Moth, *Epiphyas postvittana*. 2015.

56. Olivier V, Monsempes C, François MC, Poivet E, Jacquin-Joly E. Candidate chemosensory ionotropic receptors in a Lepidoptera. *Insect molecular biology*. 2011; 20(2):189–99. doi: [10.1111/j.1365-2583.2010.01057.x](https://doi.org/10.1111/j.1365-2583.2010.01057.x) PMID: [21091811](https://pubmed.ncbi.nlm.nih.gov/21091811/)
57. Leal WS, Zhang J, Wang B, Dong S, Cao D, Dong J, et al. Antennal Transcriptome Analysis and Comparison of Chemosensory Gene Families in Two Closely Related Noctuidae Moths, *Helicoverpa armigera* and *H. assulta*. *Plos One*. 2015; 10(2):e0117054. doi: [10.1371/journal.pone.0117054](https://doi.org/10.1371/journal.pone.0117054) PMID: [25659090](https://pubmed.ncbi.nlm.nih.gov/25659090/)
58. Forstner M, Gohl T, Breer H, Krieger J. Candidate pheromone binding proteins of the silkworm *Bombyx mori*. *Invertebrate Neuroscience*. 2006; 6(4):177–87. PMID: [17082917](https://pubmed.ncbi.nlm.nih.gov/17082917/)
59. Vogt RG, Riddiford LM. Pheromone binding and inactivation by moth antennae. 1981.
60. Xiu W-M, Dong S-L. Molecular characterization of two pheromone binding proteins and quantitative analysis of their expression in the beet armyworm, *Spodoptera exigua* Hübner. *Journal of chemical ecology*. 2007; 33(5):947–61. PMID: [17393279](https://pubmed.ncbi.nlm.nih.gov/17393279/)
61. Siciliano P, Scolari F, Gomulski LM, Falchetto M, Manni M, Gabrieli P, et al. Sniffing out chemosensory genes from the Mediterranean fruit fly, *Ceratitidis capitata*. 2014.
62. Gong D-P, Zhang H-j, Zhao P, Lin Y, Xia Q-Y, Xiang Z-H. Identification and expression pattern of the chemosensory protein gene family in the silkworm, *Bombyx mori*. *Insect biochemistry and molecular biology*. 2007; 37(3):266–77. PMID: [17296501](https://pubmed.ncbi.nlm.nih.gov/17296501/)
63. Matthews RW, Matthews JR. *Insect behavior*: Springer Science & Business Media; 2009.
